# Supplementary material
Source: Springer Nature journal article supplement (https://www.springermedizin.de/resource/supplementary/12936_2008_638_MOESM4_ESM.pdf/9547882)
Supplement: MOESM4 [file 9547882]

10 20 30 40 50 60 70 80 90 100 110 120 130 140 150  
 A. gambiae M The Gambia ATTCGAGATACATTTTACTCCACTCAGAATTTAATGCATTGTTACGCTGAACAATAGCGGTTAGCTGAGAATAATAAGGAACTGCATTTAATTCATTATTTTGCATGTTTAATAGTCTCAAGTCTCAAAATGGGCCGGTCTCGTAGTA  
 A. gambiae M Mali .G.  
 A. gambiae M B. Faso .G.  
 A. gambiae M Benin .G.  
 A. gambiae M Nigeria .G.  
 A. gambiae M Cameroon .G.  
 A. gambiae M Angola .G.  
 A. gambiae S Senegal .G. C.  
 A. gambiae S Mali .G. C.  
 A. gambiae S B. Faso .G. C.  
 A. gambiae S Ghana .G. C.  
 A. gambiae S Ivory Coast .G. C.  
 A. gambiae S Nigeria .G. C.  
 A. gambiae S Cameroon .G. C.  
 A. gambiae S Angola .G. C.  
 A. gambiae S Tanzania .G. C.  
 A. quadriannulatus A Zimbabwe .CG. .T. A. .CA. .G. .G. C. .A. .G.  
 A. melas Angola .CG. .T. A. .T. .G. .G. G. .G. G. T.  
 A. arabiensis Zimbabwe .CG. T. A. T. .G. .G. .C.  
 A. arabiensis Senegal .CG. T. A. T. .G. .G. .C.  
 160 170 180 190 200 210 220 230 240 250 260 270 280 290 300

A. gambiae M The Gambia CAGTCGTCTACTCGTACGACTTAACAACATGCCCTGCATGGGTTCAATCCCCAAATAGACCCGCCCCATACGTAGGACTGACTATCCTGCCTATGGGGGGAATCAATTAGTCACTGAAAGCCCAAGCCCAAGTGGTTACAGGCAGGC  
 A. gambiae M Mali .A.  
 A. gambiae M B. Faso .A.  
 A. gambiae M Benin .G. A.  
 A. gambiae M Nigeria .A.  
 A. gambiae M Cameroon  
 A. gambiae M Angola  
 A. gambiae S Senegal  
 A. gambiae S Mali  
 A. gambiae S B. Faso  
 A. gambiae S Ghana  
 A. gambiae S Ivory Coast  
 A. gambiae S Nigeria  
 A. gambiae S Cameroon  
 A. gambiae S Angola  
 A. gambiae S Tanzania  
 A. quadriannulatus A Zimbabwe  
 A. melas Angola  
 A. arabiensis Zimbabwe  
 A. arabiensis Senegal

310 320 330 340 350 360 370 380 390 400 410 420  
 A. gambiae M The Gambia CTTGACCGACATCGGTTGTTGAGCCAAAGCAGGAAAGAAAGAAAGAAAGTAGTCTAAATAGTTAAAAAATGGAATTTTCATGTAATTTGGTGTTAGCAATATCCAATTAAATATCAATGAAATGT  
 A. gambiae M Mali .G. T.  
 A. gambiae M B. Faso .G. T.  
 A. gambiae M Benin  
 A. gambiae M Nigeria  
 A. gambiae M Cameroon  
 A. gambiae M Angola  
 A. gambiae S Senegal .G. T.  
 A. gambiae S Mali .G. T.  
 A. gambiae S B. Faso .G. T.  
 A. gambiae S Ghana .G. T.  
 A. gambiae S Ivory Coast .G. T.  
 A. gambiae S Nigeria .G. T.  
 A. gambiae S Cameroon .G. T.  
 A. gambiae S Angola .G. T.  
 A. gambiae S Tanzania .G. T.  
 A. quadriannulatus A Zimbabwe .CT. .G. .A. .G.  
 A. melas Angola .G.  
 A. arabiensis Zimbabwe .A. G. .G.  
 A. arabiensis Senegal .A. G. .G.
